# Supplementary material for: Elucidating the Role of Optical Activity of Polymers in Protein–Polymer Interactions
Source: MDPI journal article supplement (doi:10.3390/polym16010065), 2023-12-24
Supplement: s1 [file s1]

# Elucidating the Role of Optical Activity of Polymers in Protein-Polymer Interactions

Samin Jahan<sup>1</sup>, Catherine Doyle<sup>1</sup>, Diego Combata<sup>1</sup>, Anupama Ghimire<sup>2</sup>, Jan K. Rainey<sup>2-4</sup>, Brian D. Wagner,<sup>1</sup> Marya Ahmed<sup>1,5\*</sup>

*Department of Chemistry University of Prince Edward Island, Charlottetown, Prince Edward Island, Canada, C1A 4P3<sup>1</sup>, Department of Biochemistry & Molecular Biology<sup>2</sup>, Department of Chemistry<sup>3</sup>, School of Biomedical Engineering, Dalhousie University, Halifax, Nova Scotia B3H 4R2, Canada<sup>4</sup>; Faculty of Sustainable Design Engineering<sup>5</sup>; University of Prince Edward Island, Charlottetown, Prince Edward Island, Canada, C1A 4P3*

Corresponding email address: [marahmed@upei.ca](mailto:marahmed@upei.ca)

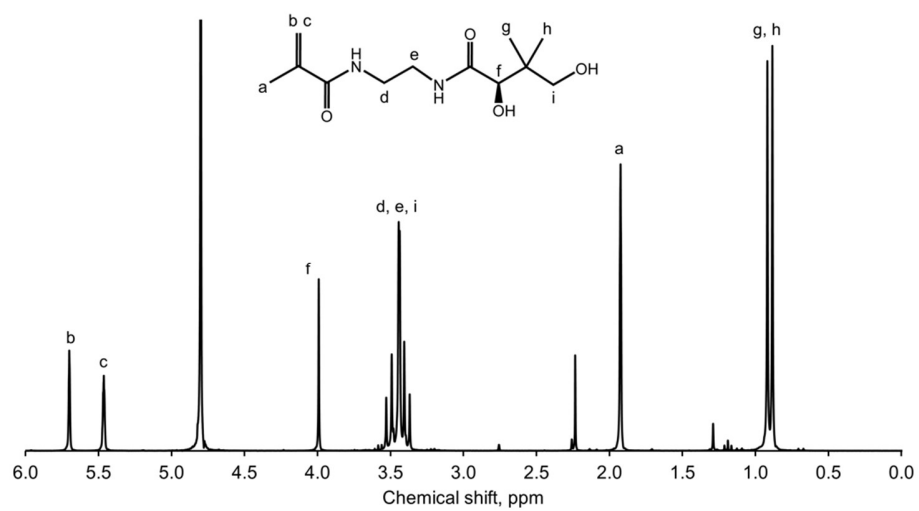

**Figure S1:** <sup>1</sup>H NMR spectrum of *R*-(+)-B5AMA monomer.

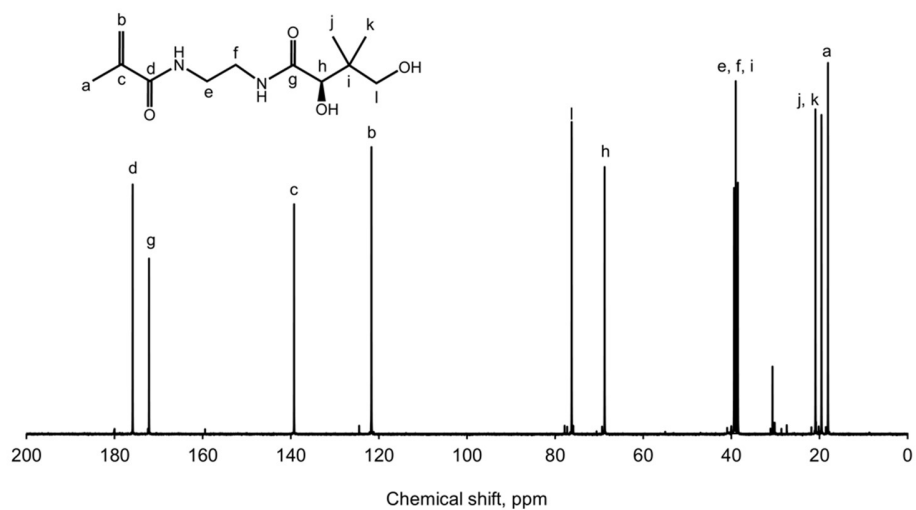

**Figure S2:** <sup>13</sup>C NMR spectrum of *R*-(+)-B5AMA monomer.

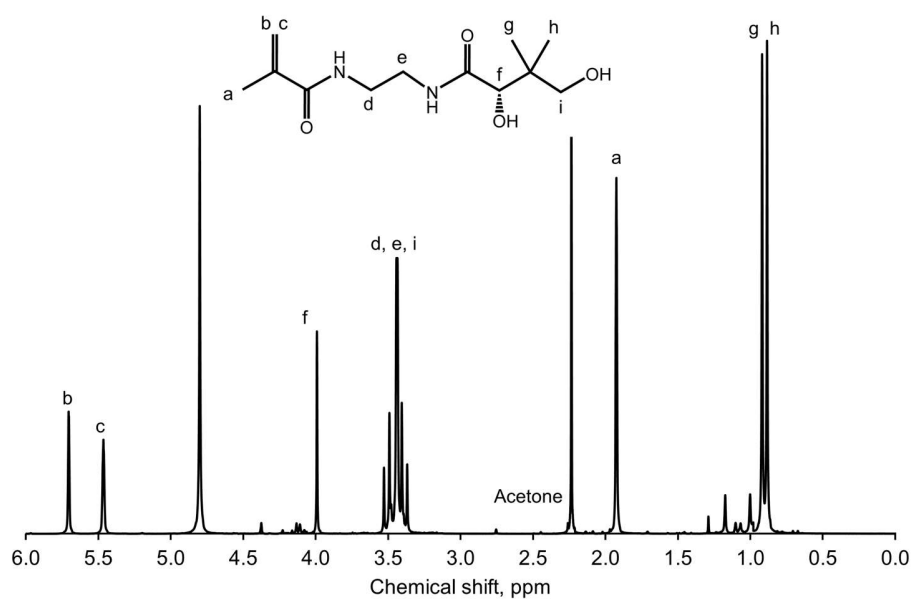

**Figure S3:** <sup>1</sup>H NMR spectrum of *S*-(-)-B5AMA monomer.

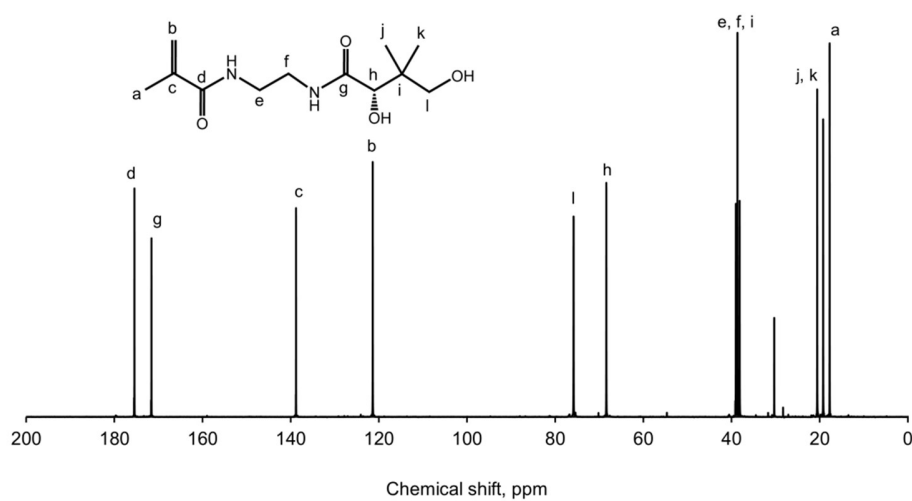

**Figure S4:** <sup>13</sup>C NMR spectrum of *S*-(-)-B5AMA monomer.

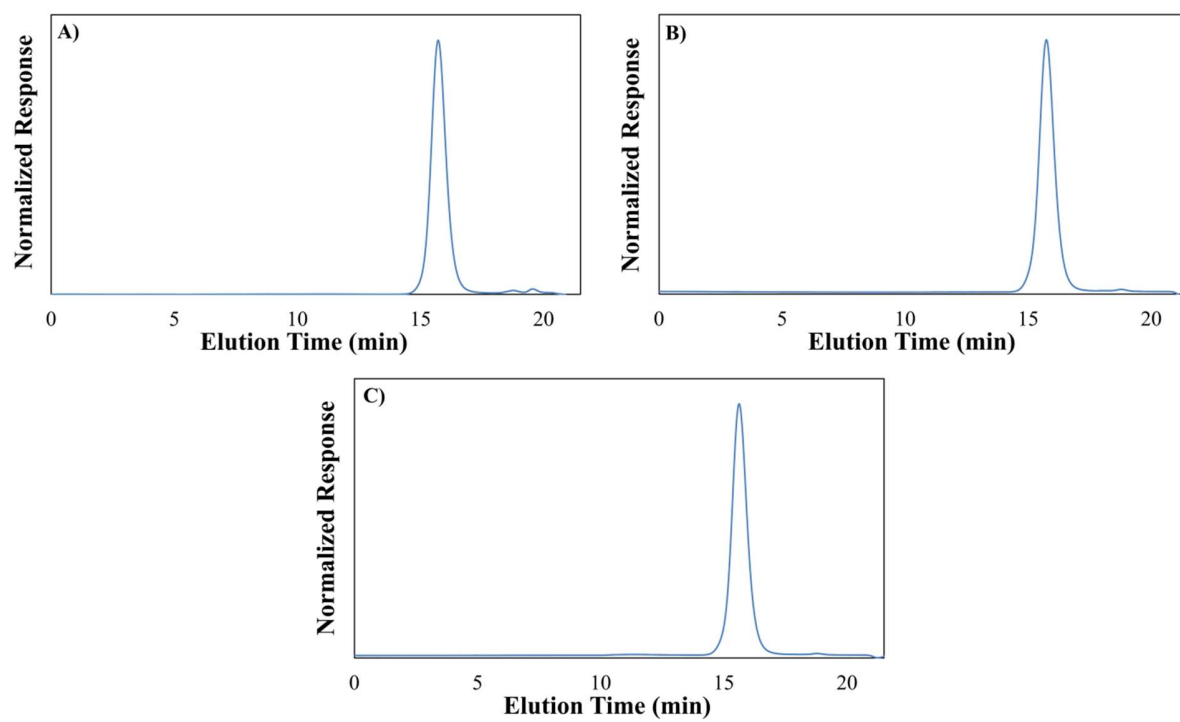

**Figure S5:** GPC Traces of poly(*R*-(+)-B5AMA<sub>38</sub>) A), poly(*S*-(-)-B5AMA<sub>38</sub>) B), and poly(*R/S*-(+/-)-B5AMA<sub>38</sub>) C).

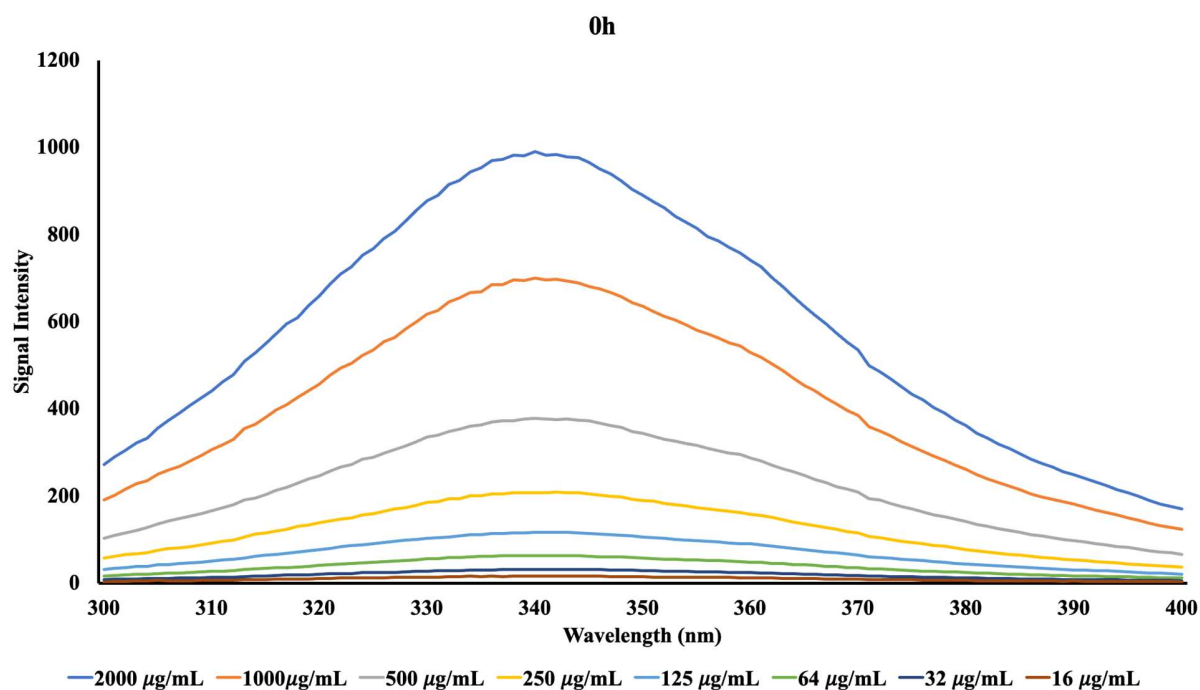

**Figure S6:** Fluorescence intensity of BSA Tryptophan residue as a function of concentration of protein at 0h. Excitation wavelength is 279 nm and emission spectra are recorded from 300-400 nm for BSA.

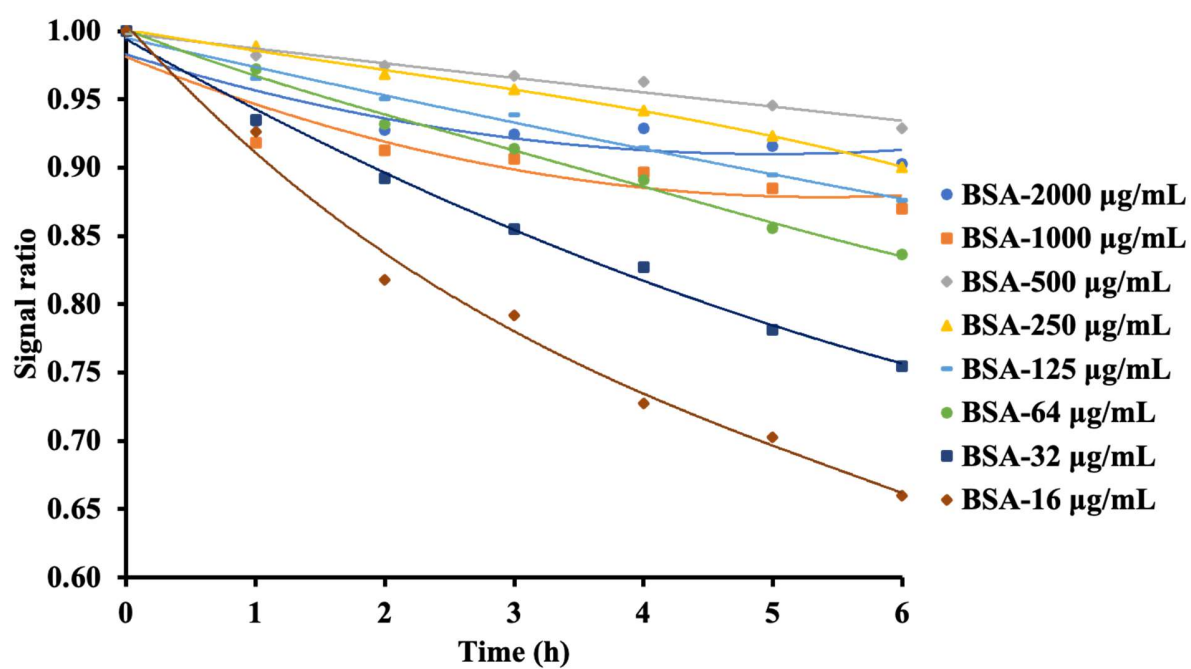

**Figure S7:** Normalized fluorescence signal of Trp residue of BSA at different concentrations of the protein.

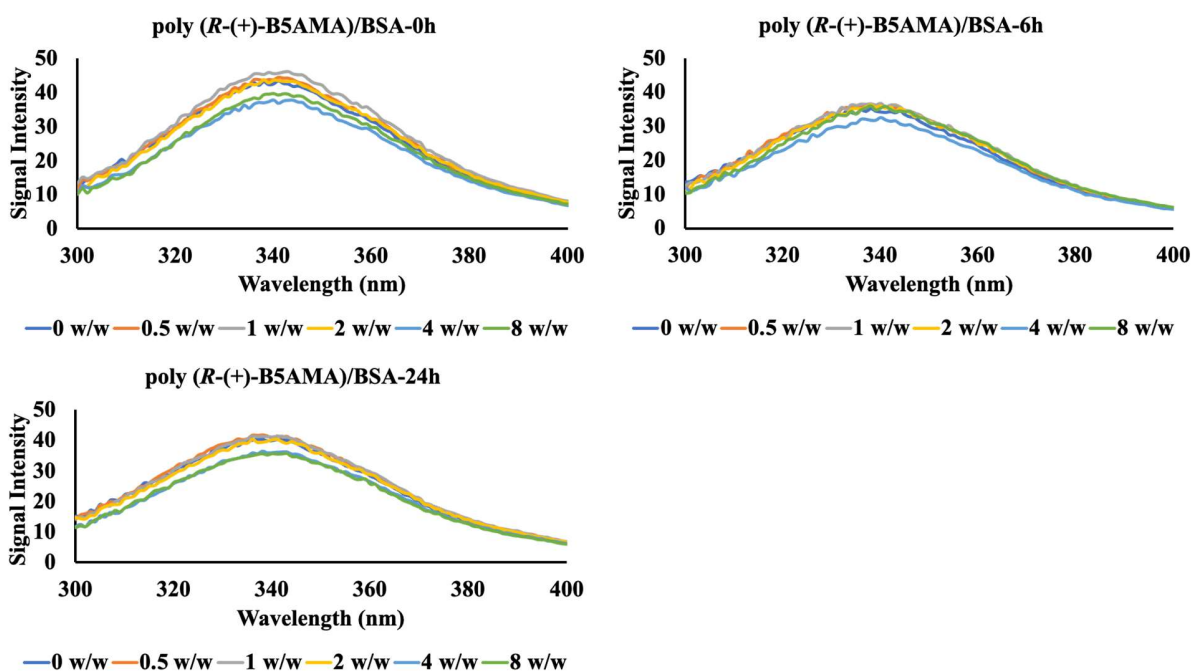

**Figure S8:** Fluorescence intensity of Trp residue of BSA, at different w/w ratios of poly (*R*-(+)-B5AMA)/BSA. The fluorescence spectra is obtained at excitation wavelength of 279 nm and emission wavelength is 300-400nm at different time points.

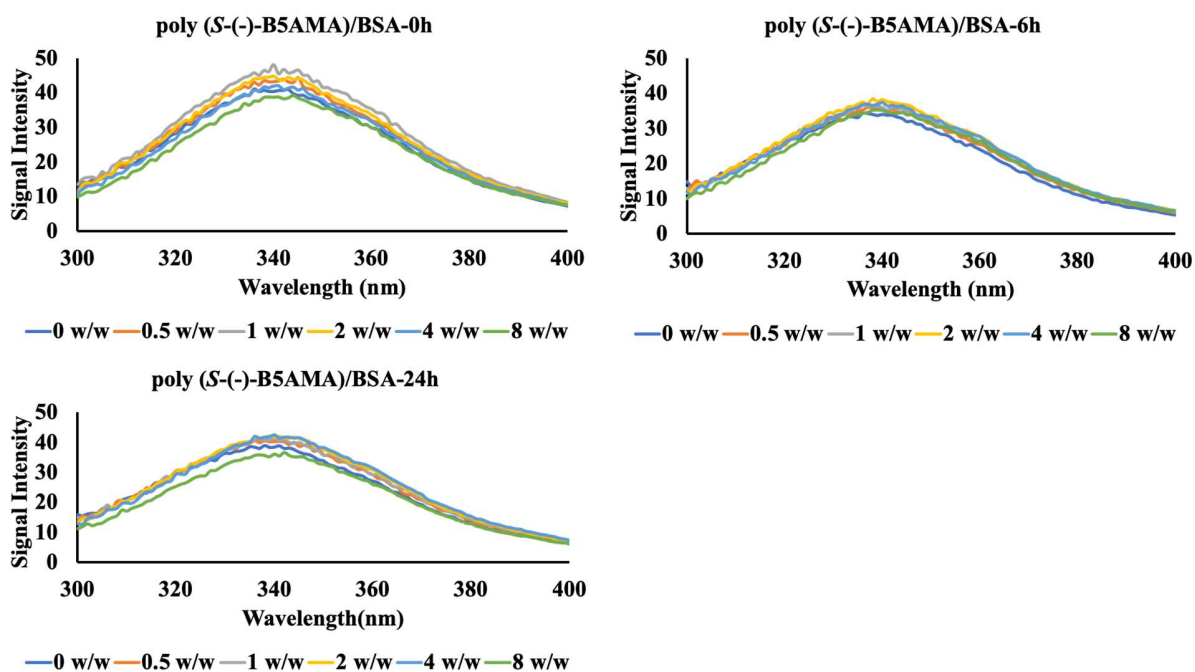

**Figure S9:** Fluorescence intensity of Trp residue of BSA, at different w/w ratios of poly (*S*-(-)-B5AMA)/BSA. The fluorescence spectra is obtained at excitation wavelength of 279 nm and emission wavelength is 300-400nm at different time points.

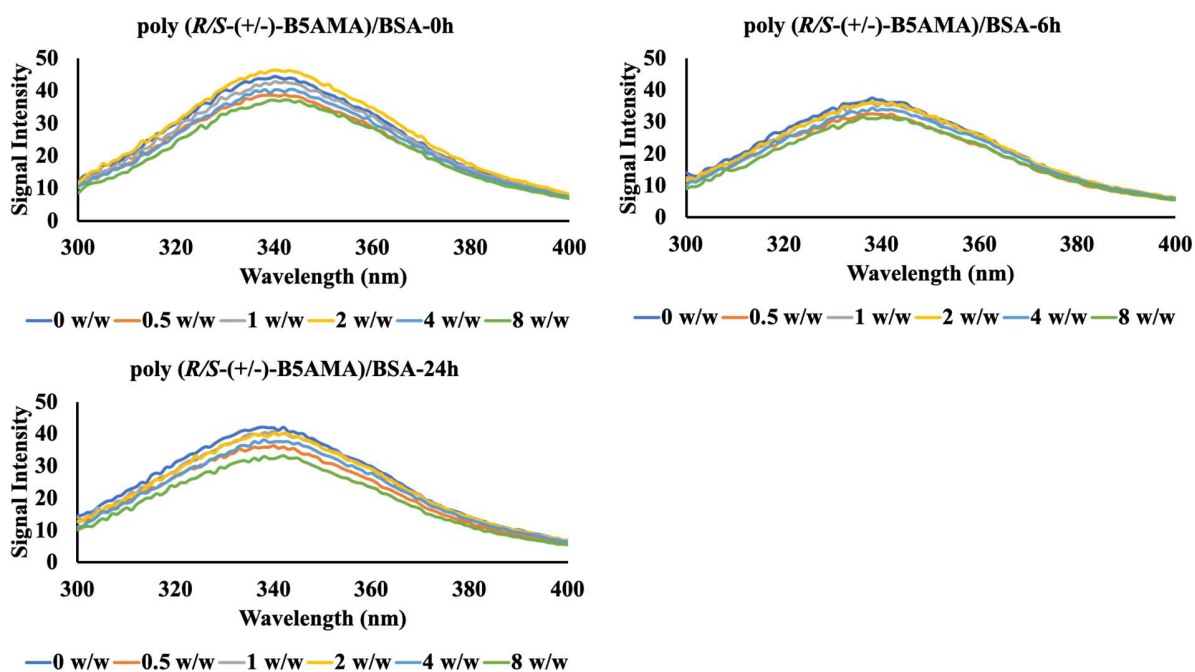

**Figure S10:** Fluorescence intensity of Trp residue of BSA, at different w/w ratios of poly (R/S-(+/-)-B5AMA)/BSA. The fluorescence spectra is obtained at excitation wavelength of 279 nm and emission wavelength is 300-400nm at different time points.

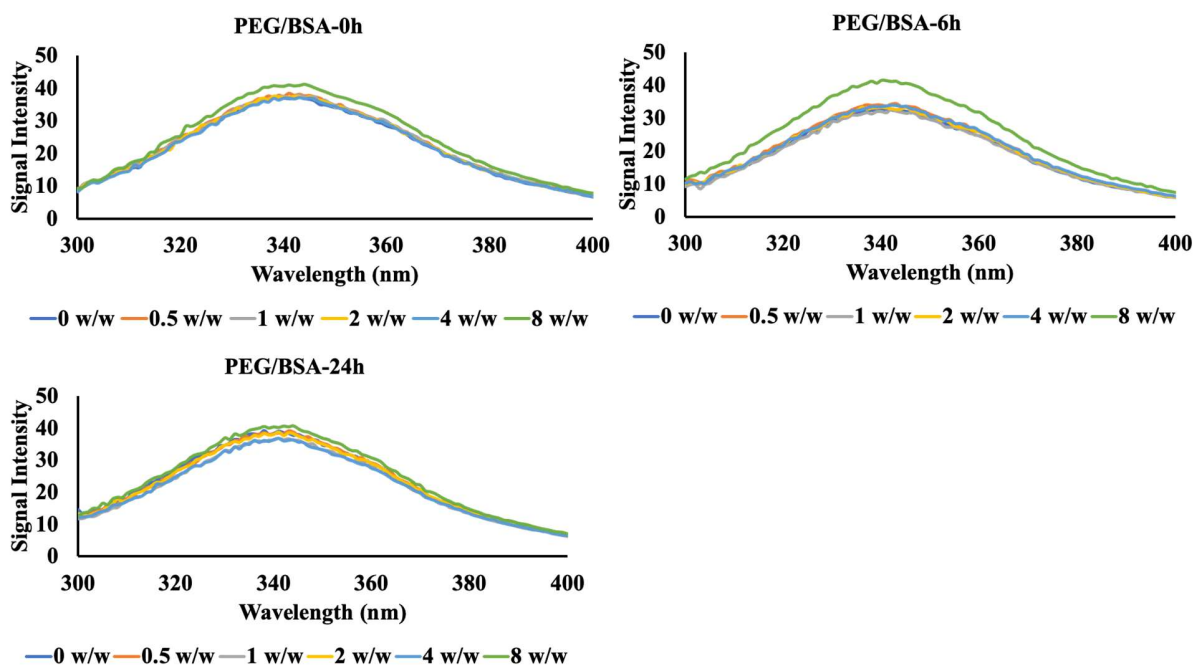

**Figure S11:** Fluorescence intensity of Trp residue of BSA, at different w/w ratios of PEG/BSA.

The fluorescence spectra is obtained at excitation wavelength of 279 nm and emission wavelength is 300-400nm at different time points.

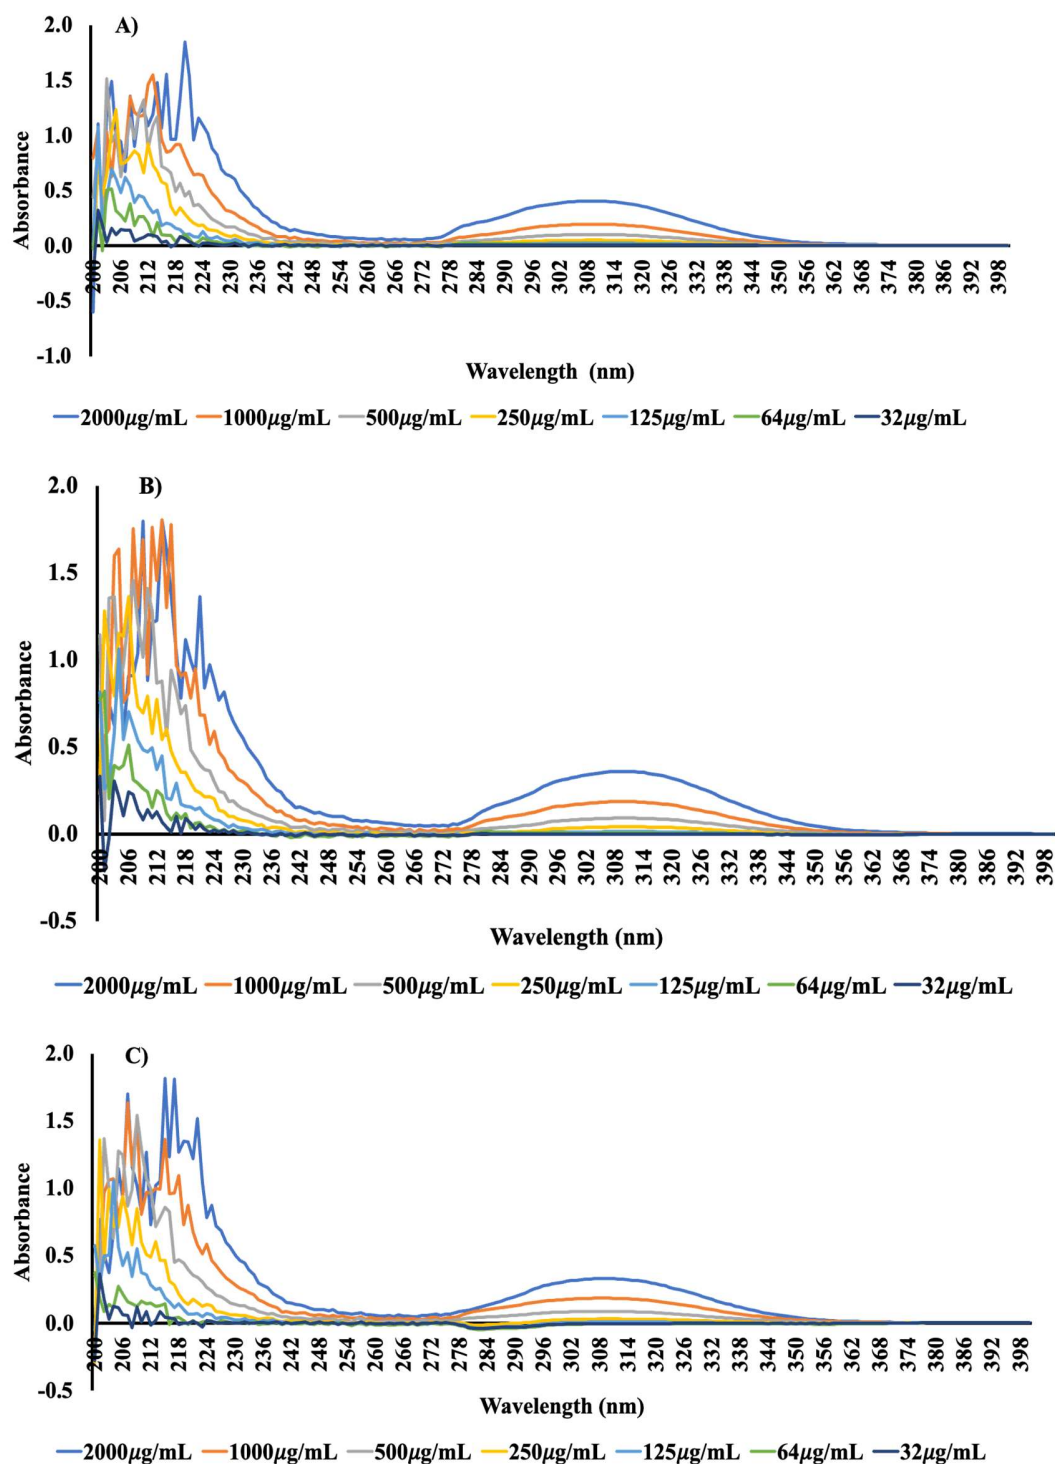

**Figure S12:** Poly (*R*-(+)-B5AMA) A), poly (*S*-(-)-B5AMA) B), and poly (*R/S*-(+/-)-B5AMA) C) absorbance spectrum from 200 to 400nm.

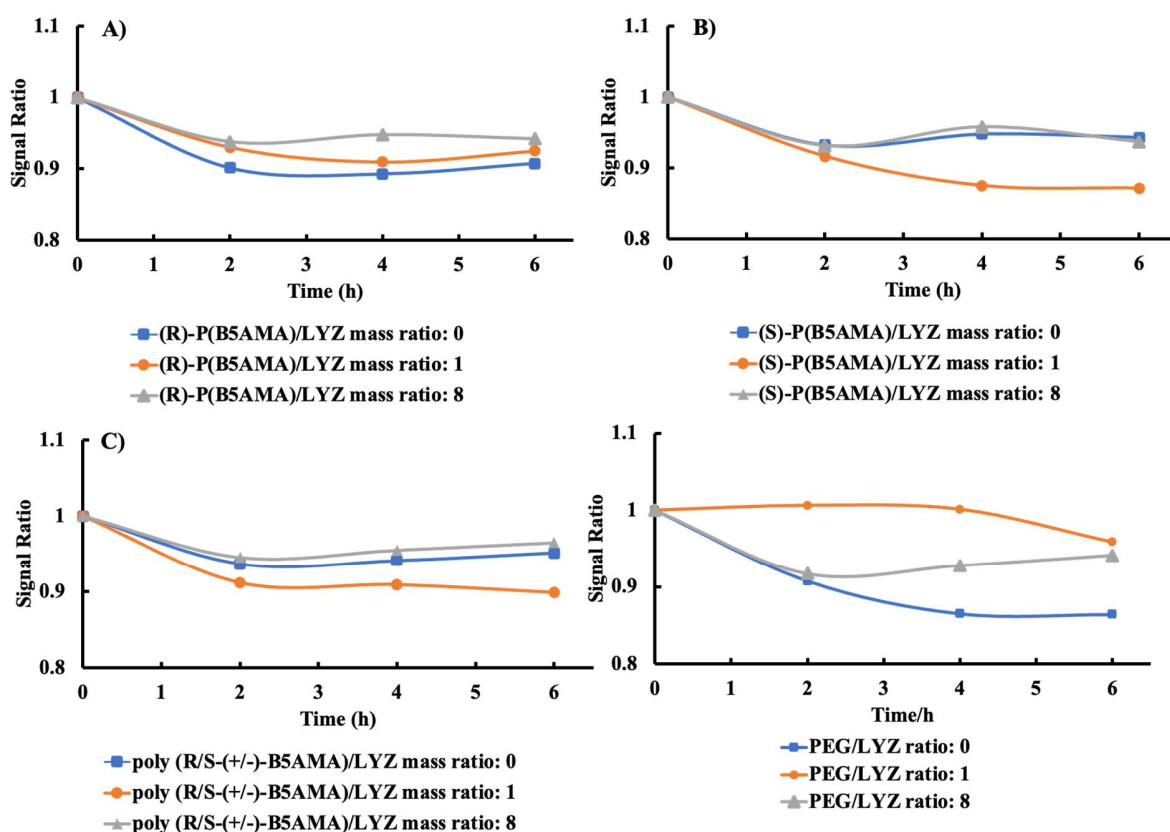

**Figure S13:** Normalized fluorescence intensity of LYZ with and without poly (*R*-(+)-B5AMA) A), poly (*S*-(-)-B5AMA) B), poly (*R/S*-(+/-)-B5AMA) C), and PEG D). Normalized fluorescence intensity is determined at polymer: protein ratio of 1:1 and 1:8 and at different time points.

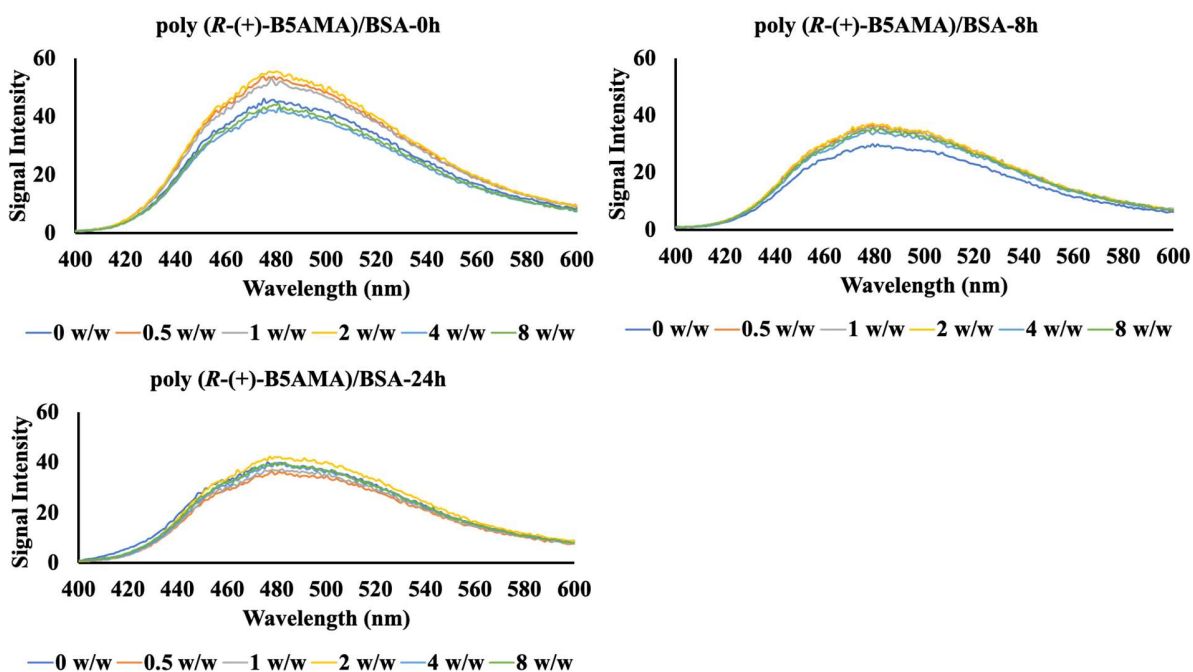

**Figure S14:** Fluorescence intensity of ANS upon interaction with BSA, at different w/w ratios of poly (R-(+)-B5AMA)/BSA. The fluorescence spectra is obtained at excitation wavelength of 279 nm and emission wavelength is 300-400nm at different time points.

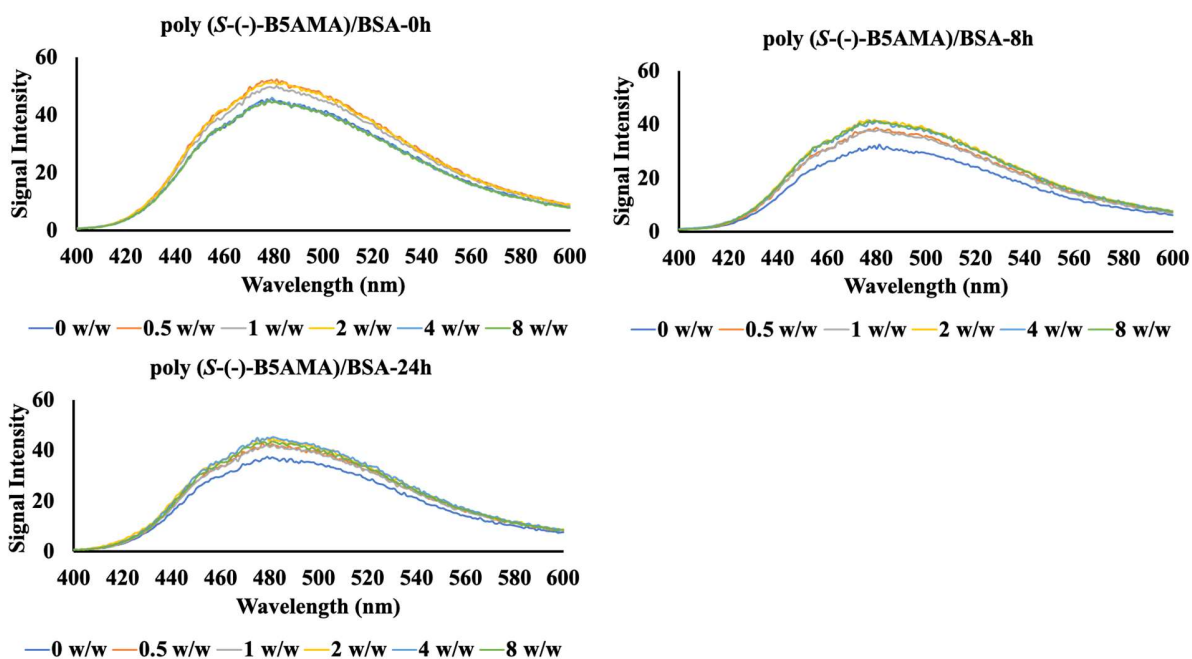

**Figure S15:** Fluorescence intensity of ANS upon interaction with BSA, at different w/w ratios of poly (S-(-)-B5AMA)/BSA. The fluorescence spectra is obtained at excitation wavelength of 279 nm and emission wavelength is 300-400nm at different time points.

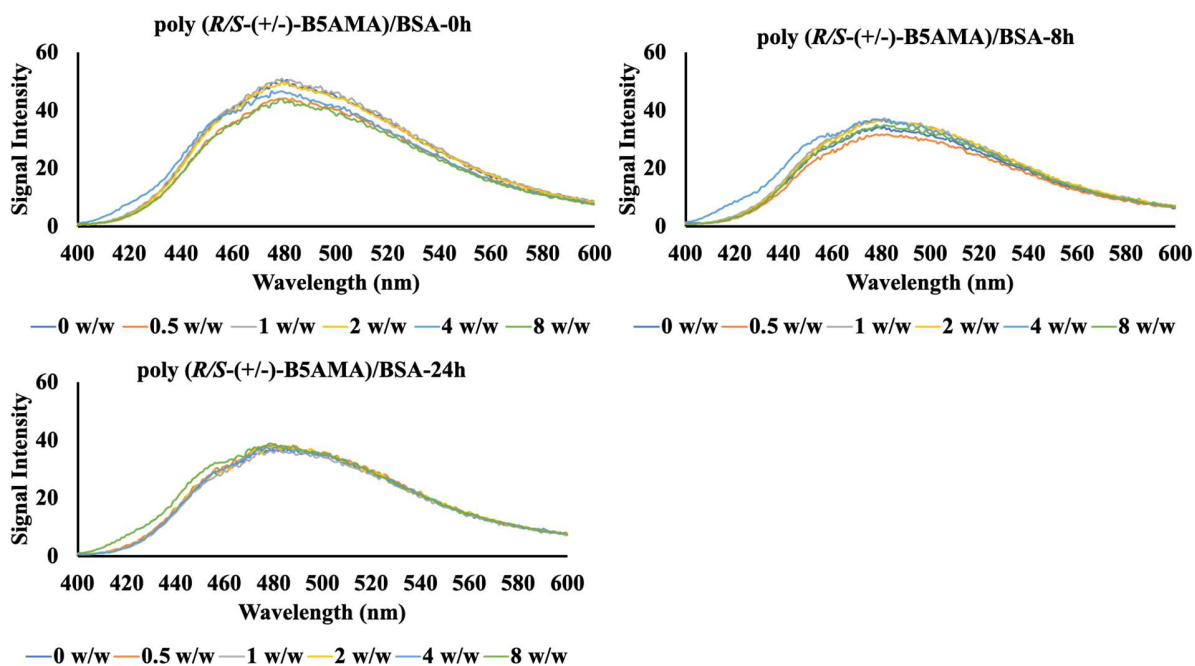

**Figure S16:** Fluorescence intensity of ANS upon interaction with BSA, at different w/w ratios of poly(*R/S*-(+/-)-B5AMA)/BSA. The fluorescence spectra is obtained at excitation wavelength of 279 nm and emission wavelength is 300-400nm at different time points.

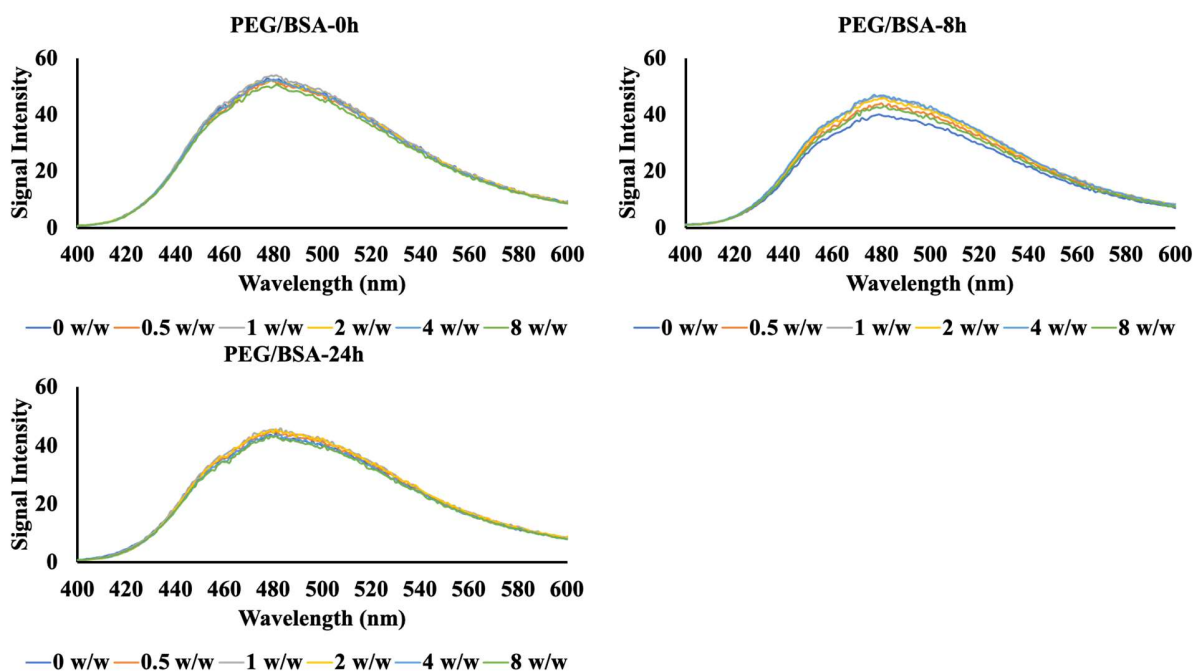

**Figure S17:** Fluorescence intensity of ANS upon interaction with BSA, at different w/w ratios of PEG/BSA. The fluorescence spectra is obtained at excitation wavelength of 279 nm and emission wavelength is 300-400nm at different time points.

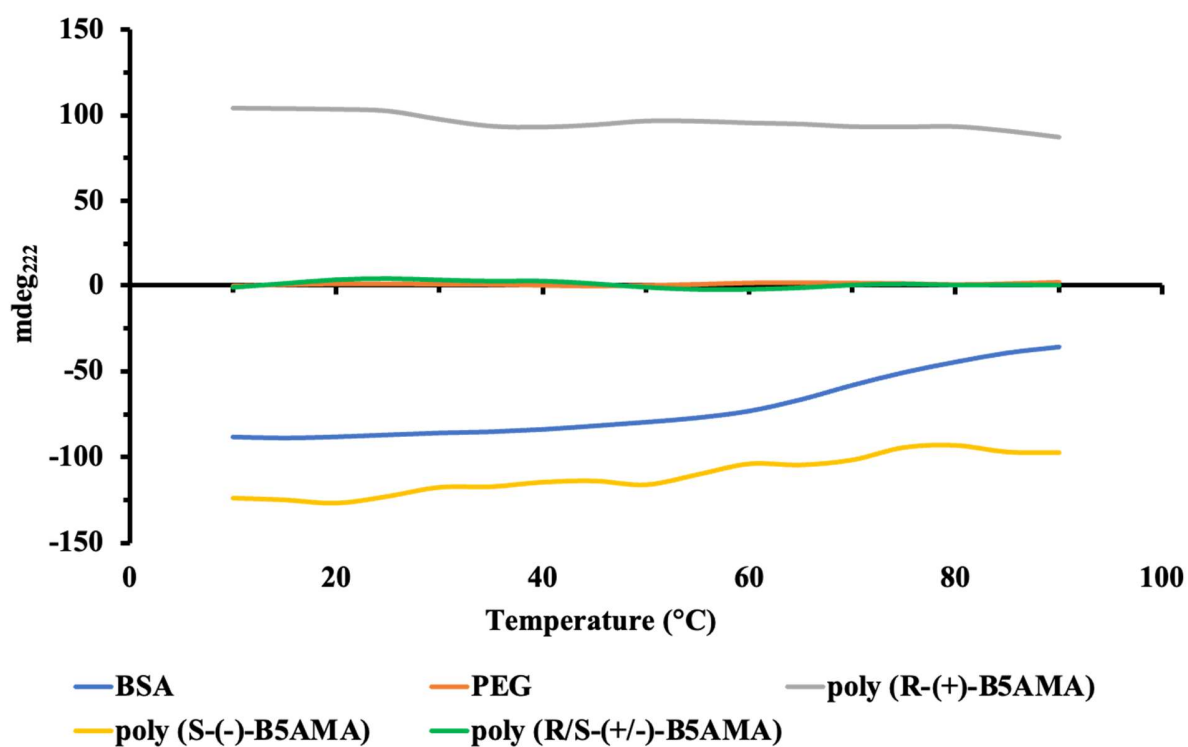

**Figure S18:** CD measurements at 222 nm during thermal denaturation of each polymer with a final concentration of 4 mg/mL.
